# Supplementary material for: A general approach to triphenylenes and azatriphenylenes: total synthesis of dehydrotylophorine and tylophorine
Source: Royal Society of Chemistry journal article supplement (doi:10.1039/b811068a), 2008-01-01

## Supplementary Information

# A General Approach to Triphenylenes and Azatriphenylenes: Total Synthesis of Dehydrotylophorine and Tylophorine

Andrew McIver, Douglas D. Young, and Alexander Deiters\*

North Carolina State University, Department of Chemistry, Raleigh, NC 27695-8204  
alex\_deiters@ncsu.edu

### 1. Synthetic Procedures and Analytical Data

**Representative procedure for compounds 6-17:** Compound **5** (5-10 mg) and the corresponding alkyne (10 eq.) or nitrile (10 eq.) were added to a flame dried microwave vial and dissolved in toluene (500  $\mu$ L). To this solution either CpCo(CO)<sub>2</sub> or Ni(CO)<sub>2</sub>(PPh<sub>3</sub>)<sub>2</sub> (10 mol%) were added and the vial was irradiated at 300 W for 4-20 minutes in a CEM Discover microwave synthesizer. The reaction was concentrated and purified by silica gel flash chromatography, eluting with 0-100% hexanes/EtOAc.

**2-Butyltriphenylene (6):** <sup>1</sup>H NMR (300 MHz, CDCl<sub>3</sub>)  $\delta$  8.69-8.61 (m, 4H), 8.57 (d, J = 8.1 Hz, 1H), 8.45 (s, 1H), 7.67-7.63 (m, 4H), 7.50 (dd, J = 8.1 Hz, 1H), 2.88 (t, J = 7.5 Hz, 2H), 1.77 (p, J = 7.5 Hz, 2H), 1.46 (s, J = 7.5 Hz, 2H), 0.99 (t, J = 7.5 Hz, 3H); <sup>13</sup>C NMR (300 MHz, CDCl<sub>3</sub>)  $\delta$  142.1, 130.1, 130.0, 129.9, 129.6, 128.2, 127.9, 127.3, 127.2, 126.9, 123.5, 123.4, 123.3, 122.9, 36.2, 34.0, 22.7, 14.2; MS (EI) calcd for C<sub>22</sub>H<sub>20</sub> M<sup>+</sup> 284, found 284.<sup>i</sup>

**2-(Triphenylen-7-yl)pyridine (7):** <sup>1</sup>H NMR (300 MHz, CDCl<sub>3</sub>)  $\delta$  9.39 (s, 1H), 8.89-8.82 (m, 2H), 8.76 (d, J = 8.7 Hz, 1H), 8.72-8.67 (m, 3H), 8.27 (dd, J = 8.5, 1.9 Hz, 1H), 7.99 (d, J = 8.1 Hz, 1H), 7.88 (td, 7.6, 1.5 Hz, 1H), 7.73-7.66 (m, 4H), 7.34 (dd, J = 7.3, 4.9 Hz, 1H); <sup>13</sup>C NMR (300 MHz, CDCl<sub>3</sub>)  $\delta$  156.4, 148.5, 138.9, 135.7, 131.1, 130.5, 130.2, 129.9, 129.5, 128.0, 127.8, 127.7, 127.6, 125.7, 124.3, 124.1, 123.9, 123.6, 123.5, 122.9, 122.7, 121.8; HRMS (ESI<sup>+</sup>) calcd for C<sub>23</sub>H<sub>16</sub>N (M+H)<sup>+</sup> 306.1277, found 306.1278.

**tert-Butyl (triphenylen-7-yl)methylcarbamate (8):** <sup>1</sup>H NMR (300 MHz, CDCl<sub>3</sub>)  $\delta$  8.66-8.61 (m, 5H), 8.55 (s, 1H), 7.69-7.64 (m, 4H), 7.59 (d, J = 7.5 Hz, 1H), 4.58 (d, J = 4.5 Hz, 2H), 1.51 (s, 9H); <sup>13</sup>C NMR (300 MHz, CDCl<sub>3</sub>)  $\delta$  156.2, 137.9, 130.2, 130.1, 129.9, 129.8, 129.7, 129.2, 127.5, 127.4, 127.3, 126.8, 123.9, 123.5, 122.3, 79.9, 45.2, 28.7; HRMS (ESI<sup>+</sup>) calcd for C<sub>24</sub>H<sub>23</sub>NO<sub>2</sub> (M+H)<sup>+</sup> 357.1729, found 357.1724.

**(Triphenylen-7-yl)methanol (9):** <sup>1</sup>H NMR (300 MHz, CDCl<sub>3</sub>)  $\delta$  8.69-8.61 (m, 6H), 7.68-7.63 (m, 5H), 4.95 (s, 2H), 1.75 (s, 1H); <sup>13</sup>C NMR (300 MHz, CDCl<sub>3</sub>)  $\delta$  139.9, 130.1, 130.0, 129.9, 129.5, 127.6, 127.4, 126.3, 123.9, 123.5, 121.7, 65.8; HRMS (ESI<sup>+</sup>) calcd for C<sub>19</sub>H<sub>14</sub>O (M+H)<sup>+</sup> 258.10447, found 258.1037.

<sup>i</sup> Due to the absence of any heteroatoms, this compound could not be ionized by ESI and thus no HRMS could be obtained.

**4-(Triphenylen-7-yl)butanenitrile (10):**  $^1\text{H}$  NMR (300 MHz,  $\text{CDCl}_3$ )  $\delta$  8.66-8.59 (m, 5H), 8.46 (d,  $J = 1.2$  Hz, 1H), 7.70-7.64 (m, 4H), 7.50 (dd,  $J = 8.4, 1.2$  Hz, 1H), 3.06 (t,  $J = 6.9$  Hz, 2H), 2.41 (t,  $J = 6.9$  Hz, 2H), 2.15 (p,  $J = 6.9$  Hz, 2H);  $^{13}\text{C}$  NMR (300 MHz,  $\text{CDCl}_3$ )  $\delta$  138.8, 130.23, 130.2, 129.8, 129.7, 128.6, 127.8, 127.6, 127.5, 127.4, 127.3, 124.0, 123.6, 123.5, 123.4, 123.3, 123.2, 119.7, 34.9, 27.2, 16.7; HRMS ( $\text{ESI}^+$ ) calcd for  $\text{C}_{22}\text{H}_{17}\text{N}$  ( $\text{M}+\text{H}$ ) $^+$  295.1361, found 295.13631.

**2,3-Bis(methoxymethyl)triphenylene (11):**  $^1\text{H}$  NMR (300 MHz,  $\text{CDCl}_3$ )  $\delta$  8.72-8.66 (m, 6H), 7.68-7.64 (m, 4H), 4.78 (s, 4H), 3.51 (s, 6H);  $^{13}\text{C}$  NMR (300 MHz,  $\text{CDCl}_3$ )  $\delta$  135.4, 130.1, 129.8, 129.4, 127.4, 123.7, 123.6, 123.5, 72.8, 58.6; HRMS ( $\text{ESI}^+$ ) calcd for  $\text{C}_{22}\text{H}_{20}\text{O}_2$  ( $\text{M}+\text{H}$ ) $^+$  316.14633, found 316.1456.

**3-Methyl-2-azatriphenylene (12):**  $^1\text{H}$  NMR (300 MHz,  $\text{CDCl}_3$ )  $\delta$  9.83 (s, 1H), 8.70-8.60 (m, 4H), 8.26 (s, 1H), 7.81-7.67 (m, 4H), 2.84 (s, 3H);  $^{13}\text{C}$  NMR (300 MHz,  $\text{CDCl}_3$ )  $\delta$  155.1, 146.2, 136.0, 131.6, 129.8, 129.5, 128.4, 128.0, 127.9, 127.7, 123.9, 123.7, 123.6, 122.6, 115.5, 24.6; HRMS ( $\text{ESI}^+$ ) calcd for  $\text{C}_{18}\text{H}_{14}\text{N}$  ( $\text{M}+\text{H}$ ) $^+$  244.1120, found 244.1121.

**3-Ethyl-2-azatriphenylene (13):**  $^1\text{H}$  NMR (300 MHz,  $\text{CDCl}_3$ )  $\delta$  9.86 (s, 1H), 8.71-8.61 (m, 4H), 8.24 (s, 1H), 7.79-7.67 (m, 4H), 3.10 (q,  $J = 7.5, 2\text{H}$ ), 1.48 (t,  $J = 7.5, 3\text{H}$ );  $^{13}\text{C}$  NMR (300 MHz,  $\text{CDCl}_3$ )  $\delta$  160.1, 146.1, 136.3, 131.7, 129.8, 129.6, 128.4, 128.1, 127.9, 127.8, 127.7, 124.0, 123.7, 123.6, 122.8, 122.6, 114.4, 31.4, 14.4; HRMS ( $\text{ESI}^+$ ) calcd for  $\text{C}_{19}\text{H}_{16}\text{N}$  ( $\text{M}+\text{H}$ ) $^+$  258.1277, found 258.1278.

**3-Vinyl-2-azatriphenylene (14):**  $^1\text{H}$  NMR (300 MHz,  $\text{CDCl}_3$ )  $\delta$  9.90 (s, 1H), 8.72-8.63 (m, 4H), 8.36 (s, 1H), 7.81-7.68 (m, 4H), 7.08 (dd,  $J = 17.4, 10.8$  Hz, 1H), 6.51 (d,  $J = 17.4$  Hz, 1H), 5.64 (d,  $J = 10.8, 1\text{H}$ );  $^{13}\text{C}$  NMR (300 MHz,  $\text{CDCl}_3$ )  $\delta$  152.7, 147.0, 137.0, 135.9, 131.7, 130.1, 129.5, 128.5, 128.1, 127.9, 127.7, 123.9, 123.8, 123.7, 123.6, 122.8, 118.3, 114.4; HRMS ( $\text{ESI}^+$ ) calcd for  $\text{C}_{19}\text{H}_{14}\text{N}$  ( $\text{M}+\text{H}$ ) $^+$  256.1120, found 256.1121.

**3-Phenyl-2-azatriphenylene (15):**  $^1\text{H}$  NMR (300 MHz,  $\text{CDCl}_3$ )  $\delta$  10.04 (s, 1H), 8.82 (s, 1H), 8.78-8.65 (m, 4 H), 8.23 (d,  $J = 7.2$  Hz, 2H), 7.80-7.72 (m, 4 H), 7.58 (t,  $J = 7.2$  Hz, 2H), 7.49 (t,  $J = 7.2, 1\text{H}$ );  $^{13}\text{C}$  NMR (300 MHz,  $\text{CDCl}_3$ )  $\delta$  154.3, 146.8, 139.6, 136.2, 131.7, 130.1, 129.6, 129.2, 129.1, 128.3, 128.2, 128.1, 127.9, 127.7, 127.3, 123.9, 123.7, 123.6, 123.5, 122.8, 113.1; HRMS ( $\text{ESI}^+$ ) calcd for  $\text{C}_{23}\text{H}_{16}\text{N}$  ( $\text{M}+\text{H}$ ) $^+$  306.1277, found 306.1276.

**3-(Azatriphen-3-yl)propan-1-ol (16):**  $^1\text{H}$  NMR (300 MHz,  $\text{CDCl}_3$ )  $\delta$  9.82 (s, 1H), 8.65-8.59 (m, 4H), 8.26 (s, 1H), 7.76-7.67 (m, 4H), 3.81 (t,  $J = 6.7$  Hz, 2H), 3.23 (t,  $J = 6.7$  Hz, 2H), 2.14 (p,  $J = 6.7$  Hz, 2H);  $^{13}\text{C}$  NMR (300 MHz,  $\text{CDCl}_3$ )  $\delta$  158.0, 145.8, 136.5, 131.8, 129.9, 129.8, 128.2, 127.8, 127.5, 124.1, 123.7, 123.67, 123.66, 115.7, 62.5, 53.6, 35.4, 32.2; HRMS ( $\text{ESI}^+$ ) calcd for  $\text{C}_{20}\text{H}_{17}\text{NO}$  ( $\text{M}+\text{H}$ ) $^+$  287.1310, found 287.1308.

**Propyl-2-(azatriphen-3-yl)acetate (17):**  $^1\text{H}$  NMR (300 MHz,  $\text{CDCl}_3$ )  $\delta$  9.90 (s, 1H), 8.73-8.62 (m, 4H), 8.42 (s, 1H), 7.78-7.68 (m, 4H), 4.25 (q,  $J = 7.2$  Hz, 2H), 4.12 (s, 2H), 1.30 (t,  $J = 7.2$  Hz, 3H);  $^{13}\text{C}$  NMR (300 MHz,  $\text{CDCl}_3$ )  $\delta$  171.0, 151.0, 146.5, 136.1, 131.6, 129.9, 129.6, 128.2, 128.0, 127.7, 127.4, 124.0, 123.6, 123.4, 122.7, 116.6, 61.4, 43.9, 14.4; HRMS ( $\text{ESI}^+$ ) calcd for  $\text{C}_{21}\text{H}_{18}\text{NO}_2$  ( $\text{M}+\text{H}$ ) $^+$  316.1332, found 316.1331.

**4,5,4',5'-Tetramethoxydiphenyl-2,2'-dicarbaldehyde (20):** *t*-BuLi (1.2 M in hexanes, 1.03 mL, 1.24 mmol) was added dropwise over 30 min to a solution of **19** (145 mg, 0.276 mmol) in THF (13 mL) at  $-78^{\circ}\text{C}$ . The solution was stirred at  $-78^{\circ}\text{C}$  for 3 h before DMF (427  $\mu\text{L}$ , 5.52 mmol) was added and the reaction mixture was allowed to warm to room temperature over 3.5 h. The reaction was quenched with  $\text{H}_2\text{O}$  (15 mL) and extracted with DCM ( $2 \times 30$  mL). The organic layers were combined, washed with  $\text{H}_2\text{O}$  (20 mL) and brine (20 mL), dried over  $\text{Na}_2\text{SO}_4$ , filtered and concentrated to dryness. The residue was purified by flash silica gel chromatography, eluting with hexanes/EtOAc (3:2) to give **20** (76.4 mg, 84%) as a light yellow solid.  $^1\text{H}$  NMR (300 MHz,  $\text{CDCl}_3$ )  $\delta$  9.66 (s, 2H), 7.55 (s, 2H), 6.79 (s, 2H), 4.00 (s, 6H), 3.95 (s, 6H);  $^{13}\text{C}$  NMR (300 MHz,  $\text{CDCl}_3$ )  $\delta$  190.0, 153.4, 149.6, 136.3, 113.9, 108.8, 56.6, 56.4; HRMS (ESI<sup>+</sup>) calcd for  $\text{C}_{18}\text{H}_{19}\text{O}_6$  (M+H)<sup>+</sup> 331.1176, found 331.1172.

**4,5,4',5'-Tetramethoxy-2,2'-diethynyldiphenyl (21):**  $\text{CBr}_4$  (261 mg, 0.787 mmol),  $\text{PPh}_3$  (206 mg, 0.787 mmol), and Zn dust (51 mg, 0.787 mmol) were dissolved in DCM (3 mL) and stirred for 24 h at room temperature. The mixture was cooled to  $0^{\circ}\text{C}$  and **20** (26 mg, 0.0787 mmol) was added in 850  $\mu\text{L}$  DCM and allowed to warm to room temperature until the reaction was complete as indicated by TLC (hexanes/EtOAc, 3:2). The mixture was filtered and concentrated to dryness for purification by flash silica gel chromatography, eluting with hexanes/EtOAc (3:2) to give a light yellow solid. *n*-BuLi (2.5 M in hexanes, 74  $\mu\text{L}$ , 0.935 mmol) was added dropwise to a solution of the intermediate yellow solid (20 mg, 0.0311 mmol) in THF (1.5 mL) at  $-78^{\circ}\text{C}$  and allowed to stir for 1h. The reaction was quenched with sat.  $\text{NH}_4\text{Cl}$  (2 mL) and extracted with DCM ( $2 \times 4$  mL). The organic layers were washed with  $\text{H}_2\text{O}$  (5 mL) and brine (5 mL), dried over  $\text{Na}_2\text{SO}_4$ , filtered and concentrated to dryness. The residue was purified by flash silica gel chromatography, eluting with hexanes/EtOAc (3:2) to give **21** (9.7 mg, 96%) as a pale yellow solid.  $^1\text{H}$  NMR (300 MHz,  $\text{CDCl}_3$ )  $\delta$  7.07 (s, 2H), 6.99 (s, 2H), 3.92 (s, 6H), 3.89 (s, 6H), 2.94 (s, 2H);  $^{13}\text{C}$  NMR (300 MHz,  $\text{CDCl}_3$ )  $\delta$  149.1, 148.1, 136.7, 115.5, 113.8, 113.4, 83.4, 78.8, 56.2; HRMS (ESI<sup>+</sup>) calcd for  $\text{C}_{20}\text{H}_{18}\text{O}_4$  (M+H)<sup>+</sup> 322.1205, found 322.1203.

**Dehydrotylophorine (3):** Compounds **21** (8.2 mg, 0.025 mmol) and **22** (41.5  $\mu\text{L}$ , 0.254 mmol) were added to a flame dried microwave vial and dissolved in toluene (500  $\mu\text{L}$ ). To this solution  $\text{CpCo}(\text{CO})_2$  (10 mol %) was added and the vial was irradiated at 300 W for 20 min in a CEM Discover microwave synthesizer.  $\text{H}_2\text{O}$  (2 mL) and DCM (2 mL) were added to the reaction vial, extracted, and the  $\text{H}_2\text{O}$  layer was separated. The  $\text{H}_2\text{O}$  layer was washed DCM ( $4 \times 2$  mL), and the  $\text{H}_2\text{O}$  layer was concentrated to dryness to give 9.4 mg (78%) of **3** as a bright yellow solid.

**Tylophorine (4):**  $\text{NaBH}_4$  (1 mg, 0.022 mmol) was added to a solution of **3** (5.7 mg, 0.012 mmol) in 1 mL  $\text{H}_2\text{O}/\text{MeOH}$  (1:1). When the bubbling subsided, the reaction was refluxed for 20 min. The reaction was cooled and sat.  $\text{NH}_4\text{Cl}$  (2 mL) was added and extracted with DCM ( $2 \times 3$  mL). The organic layers were dried over  $\text{Na}_2\text{SO}_4$ , filtered and concentrated to dryness. The residue was purified by flash silica gel chromatography, eluting with 5%  $\text{MeOH}/\text{DCM}$  to give **4** (4.7 mg, 99%) as a yellow solid.

## 2. <sup>1</sup>H NMR Spectra for Compounds 3-4, 5-17, and 20-21 (300 MHz)

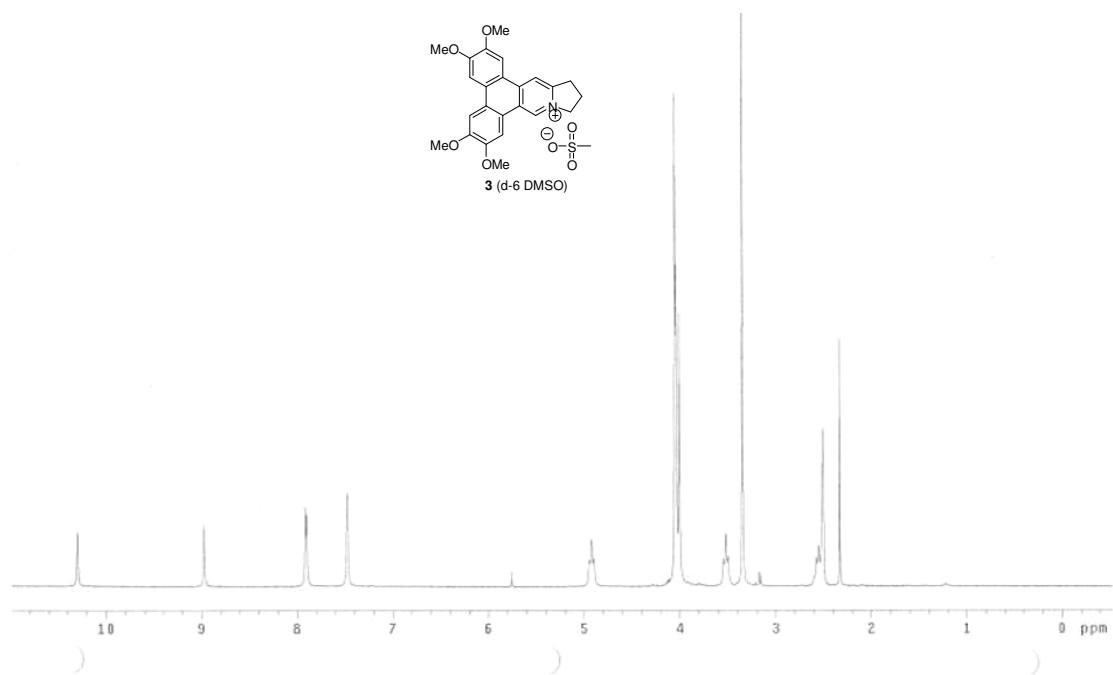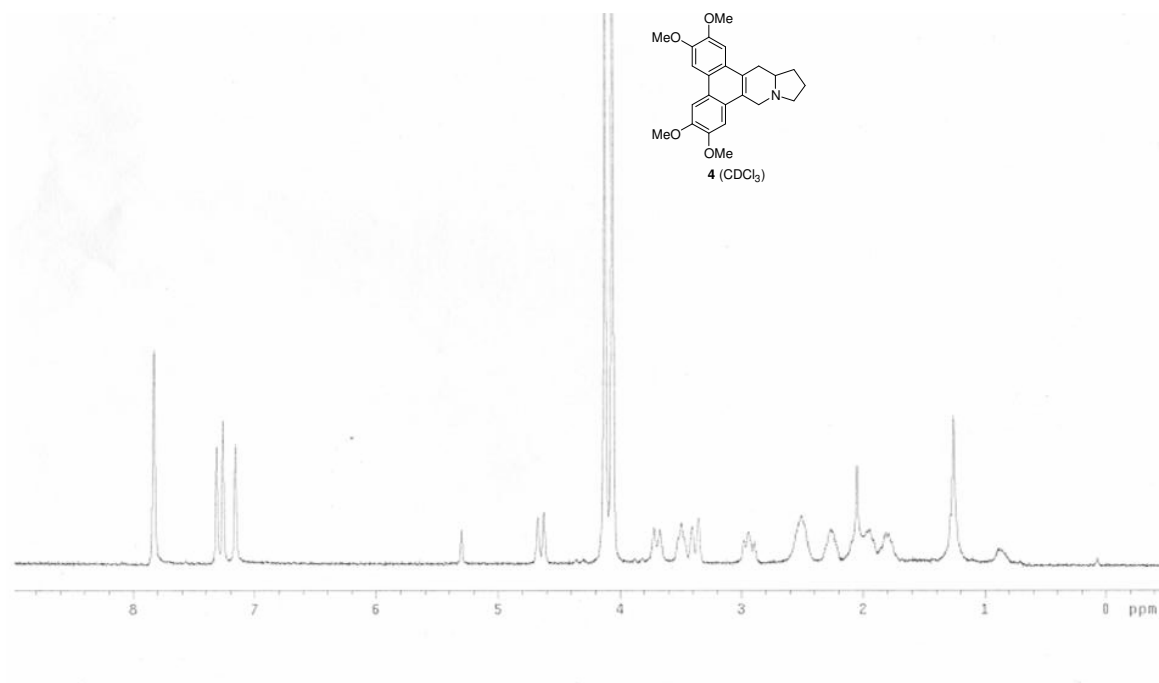

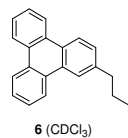

6 (CDCl<sub>3</sub>)

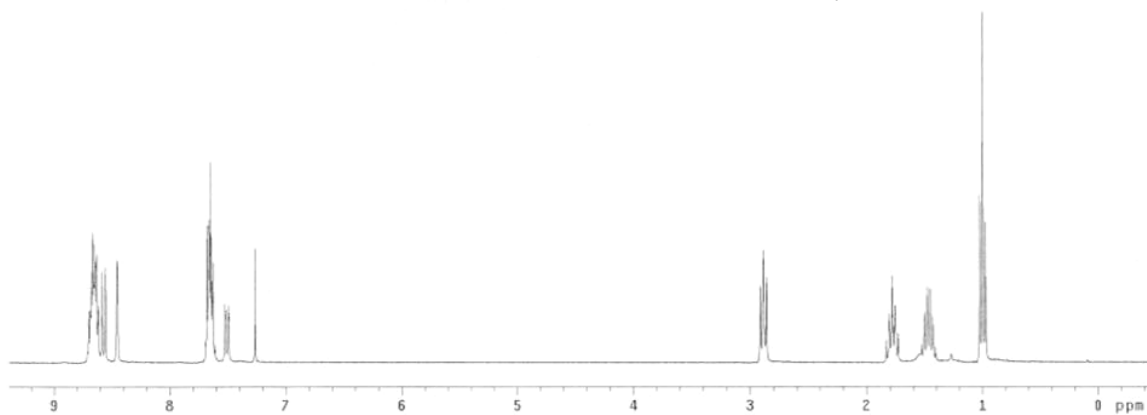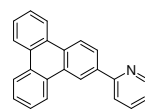

7 (CDCl<sub>3</sub>)

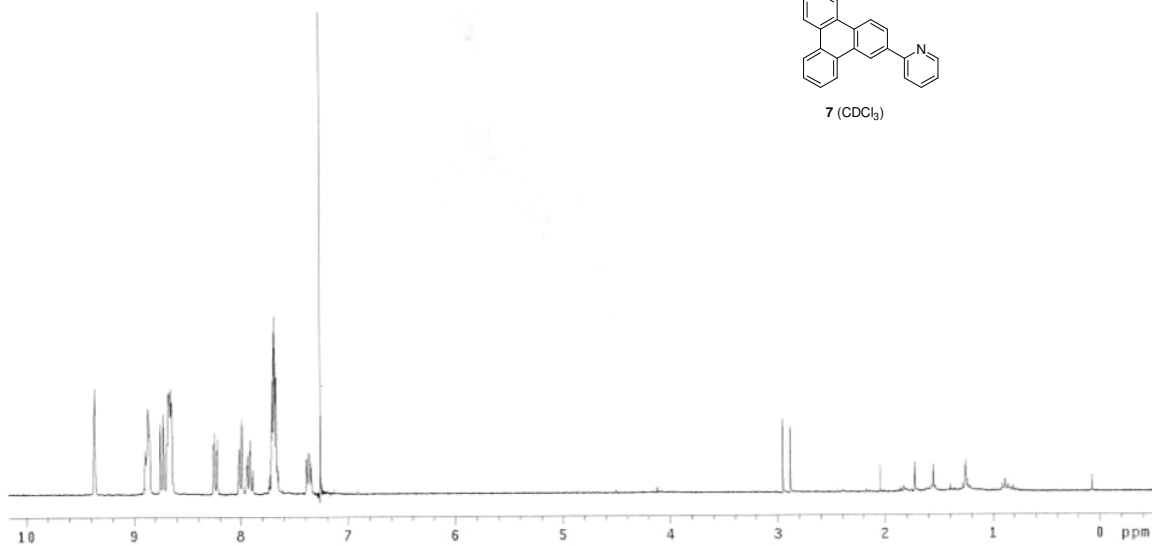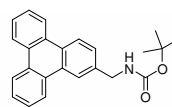

8 (CDCl<sub>3</sub>)

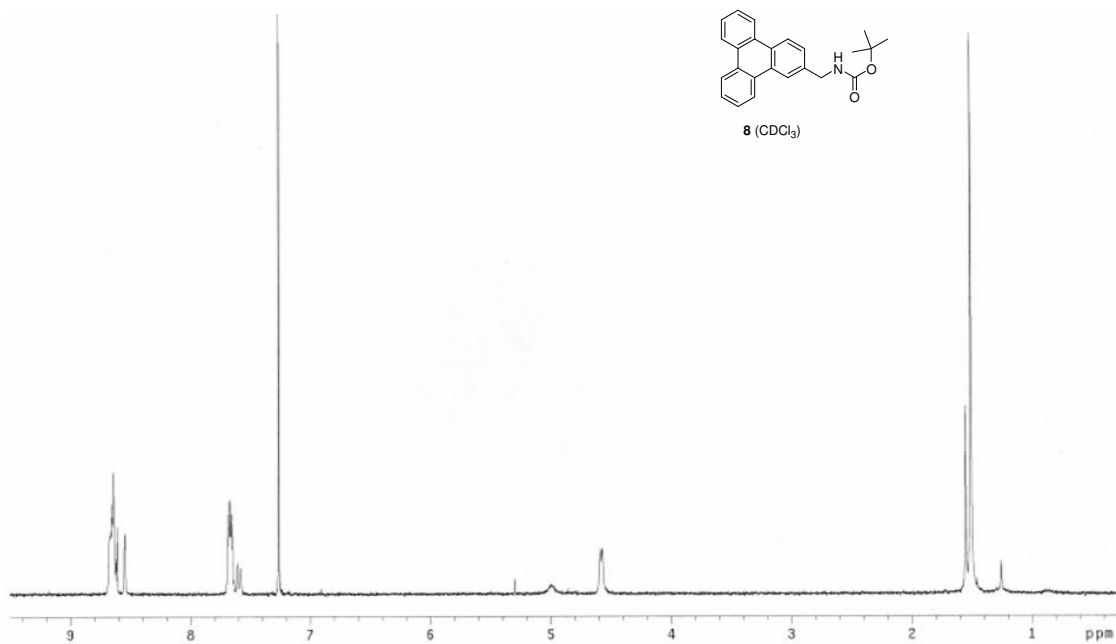

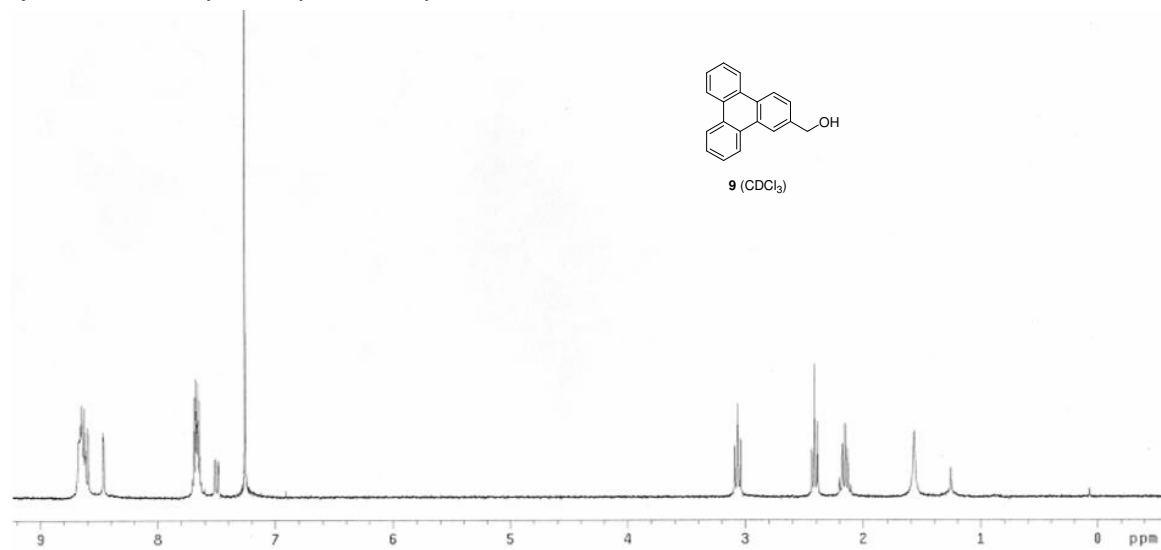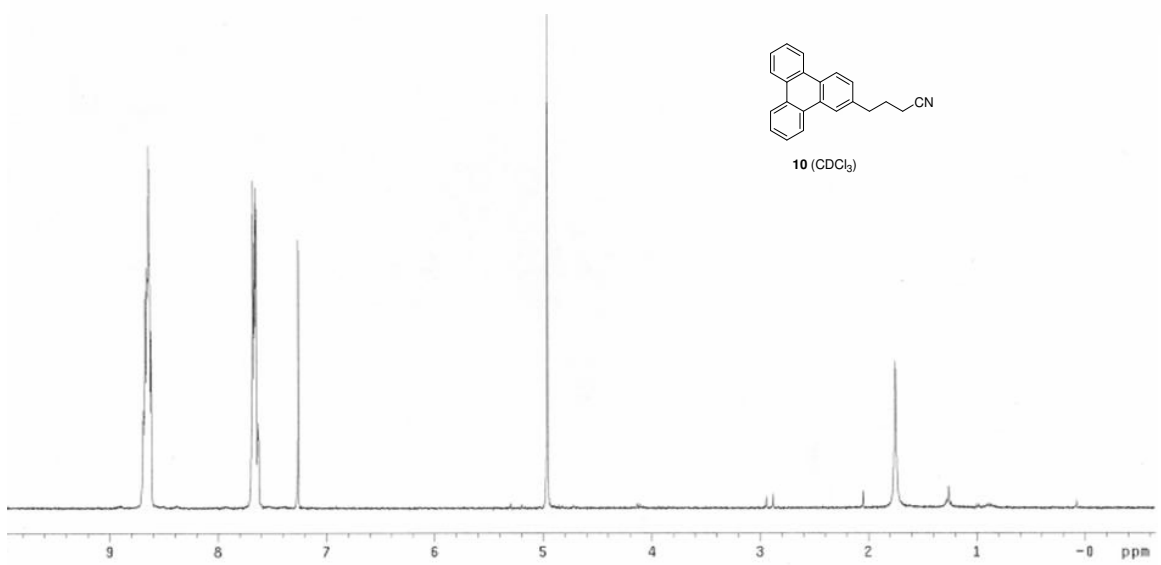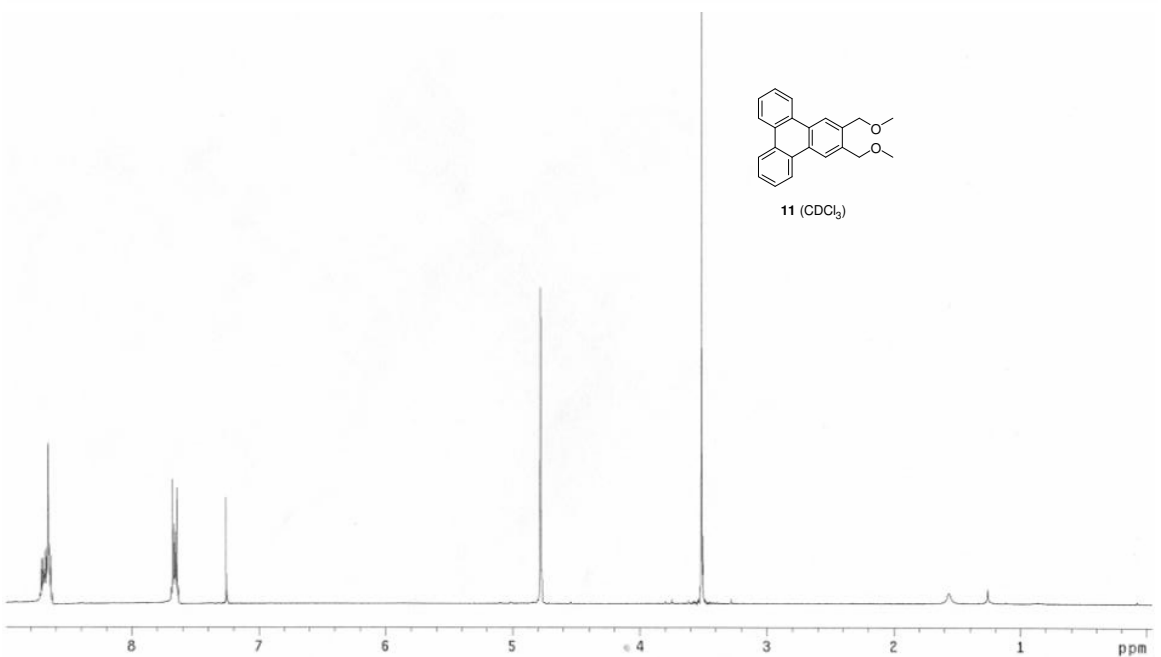

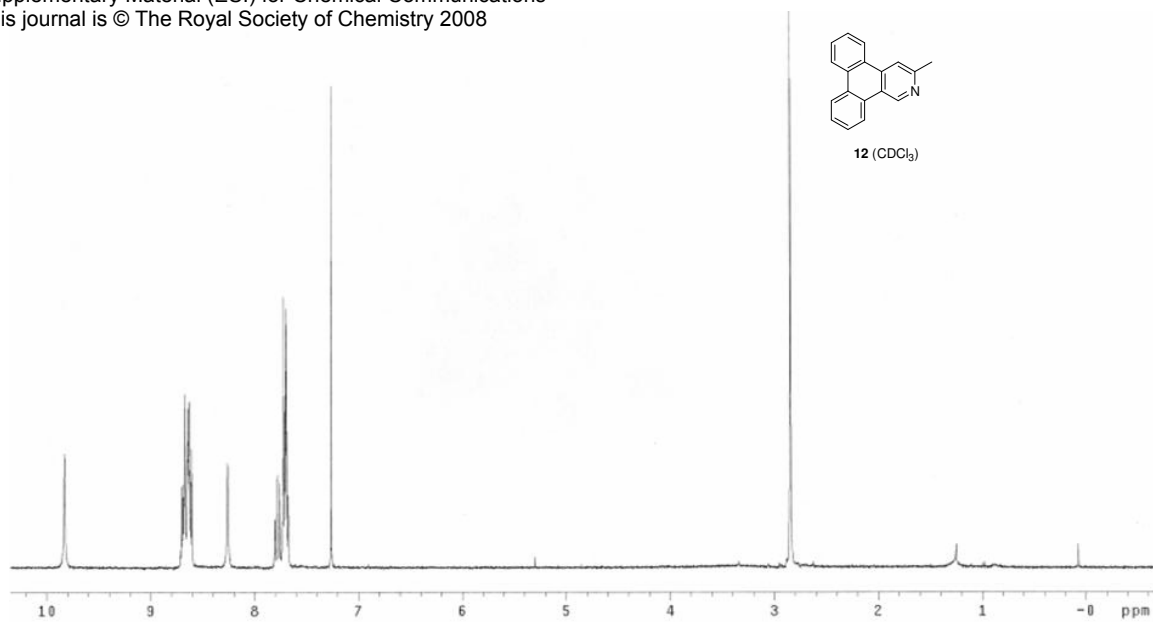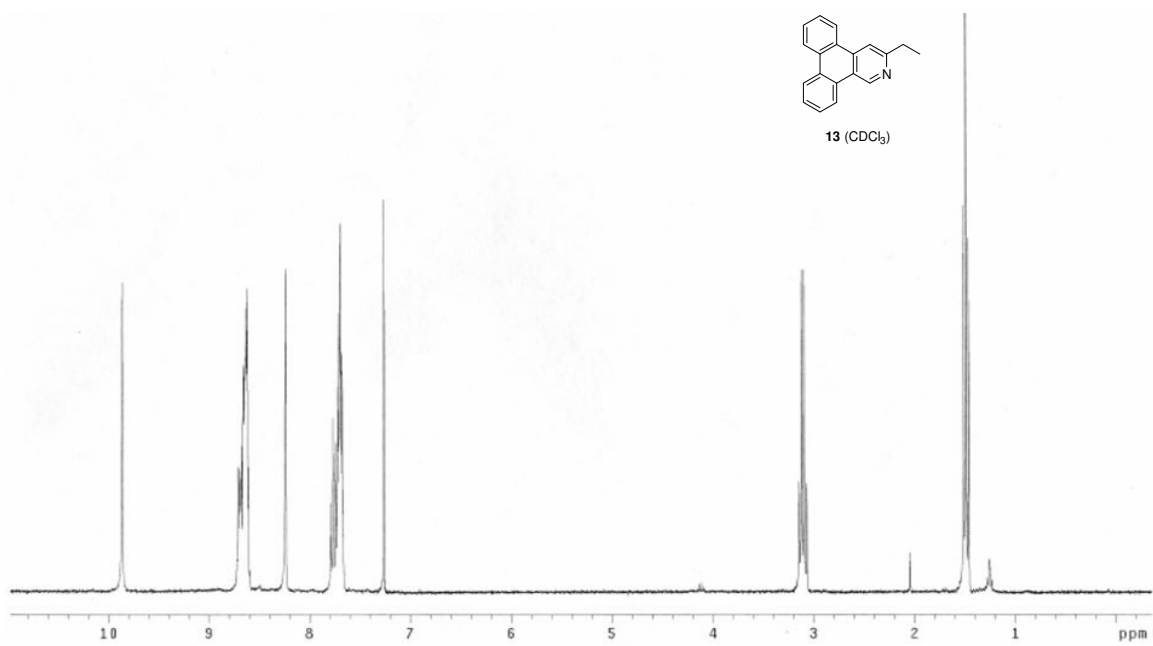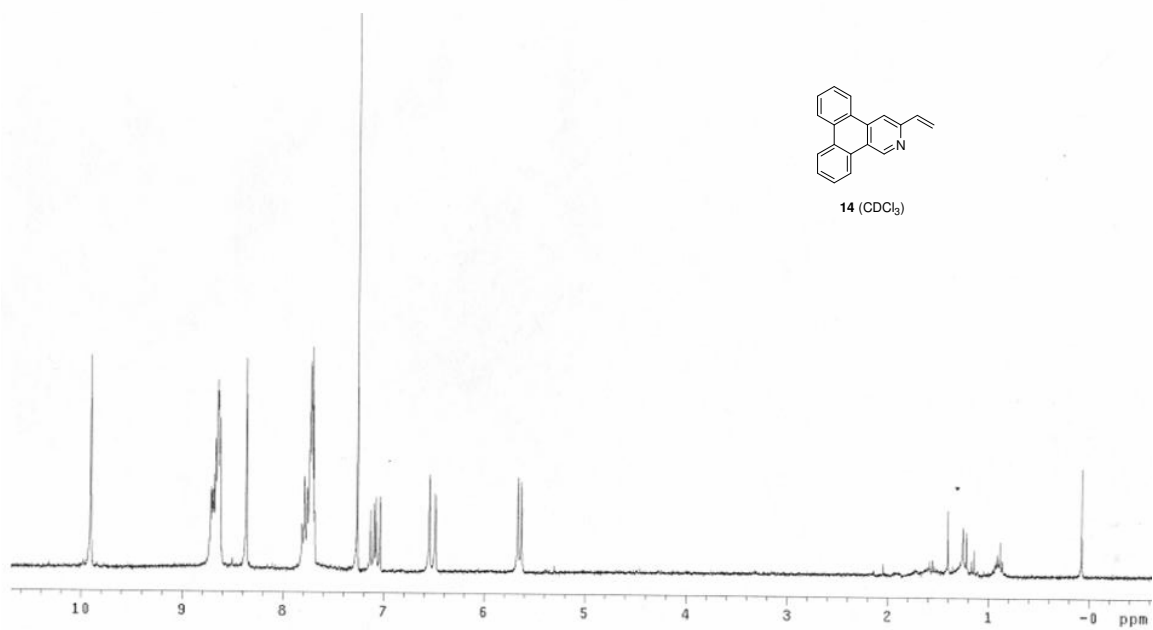

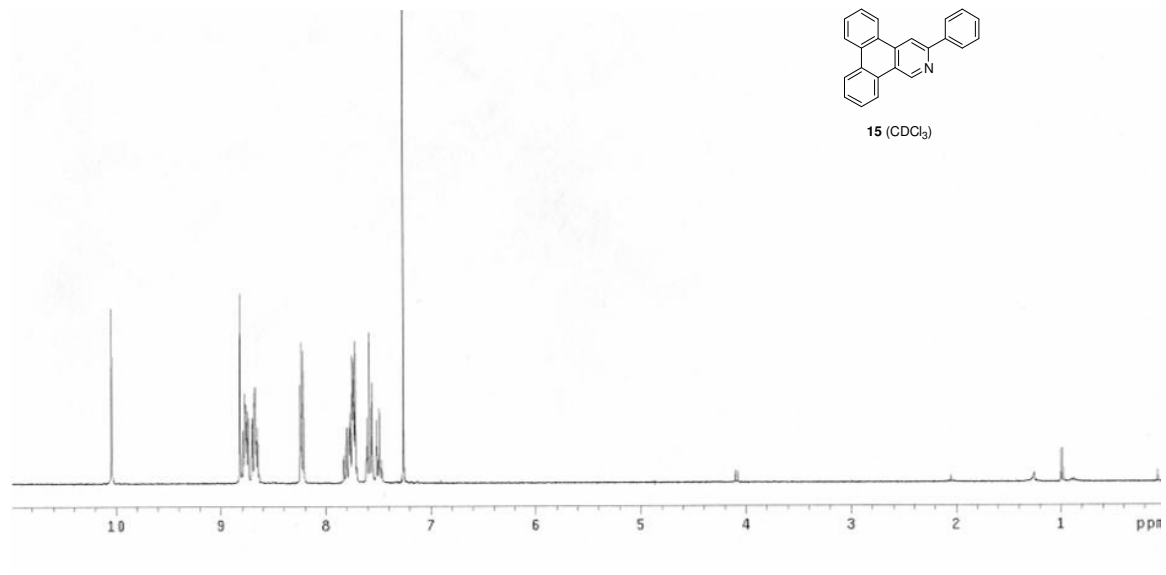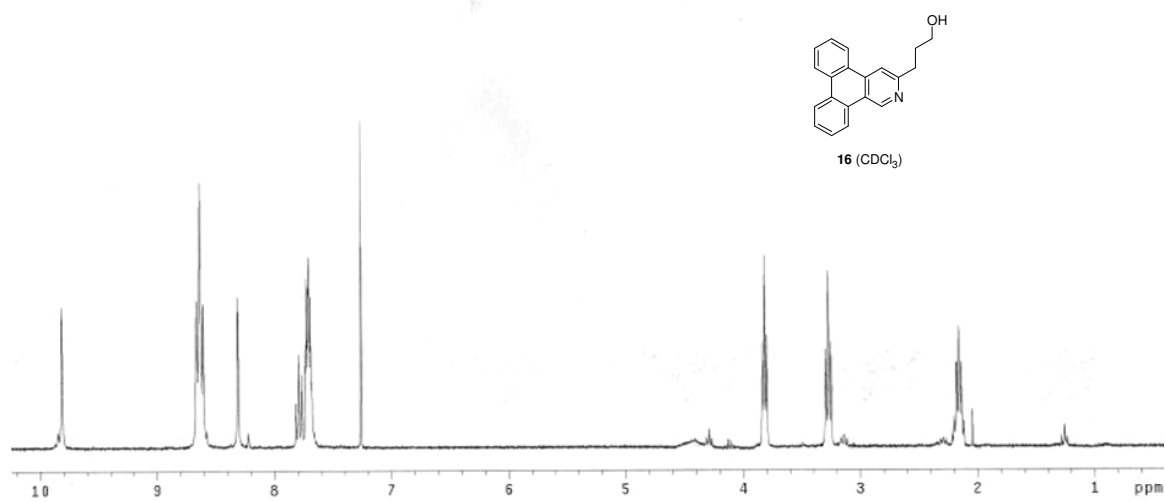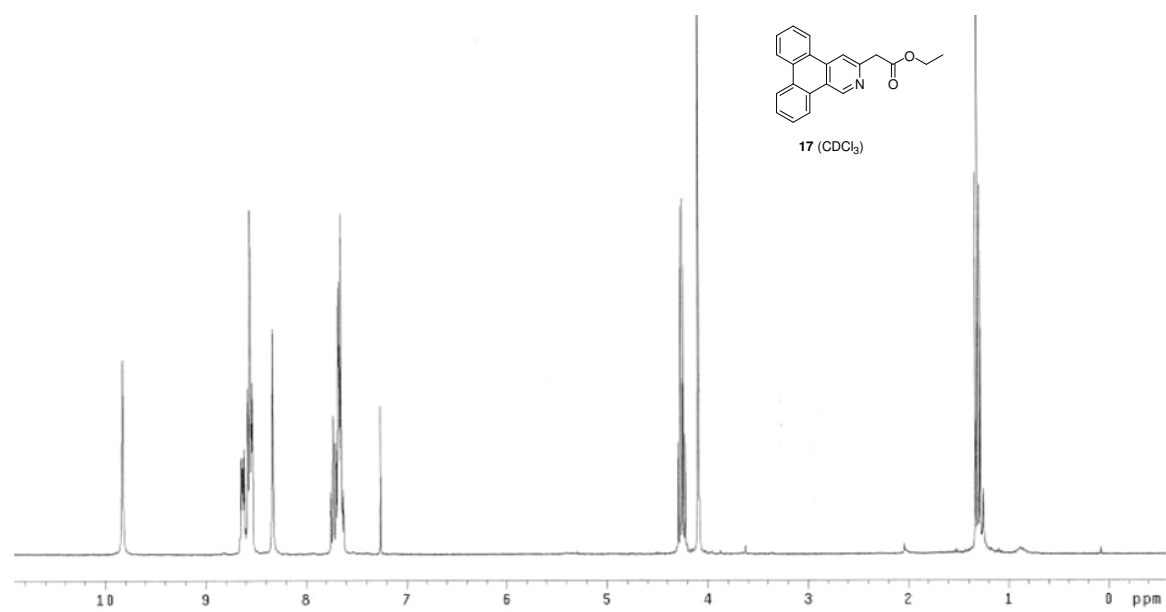



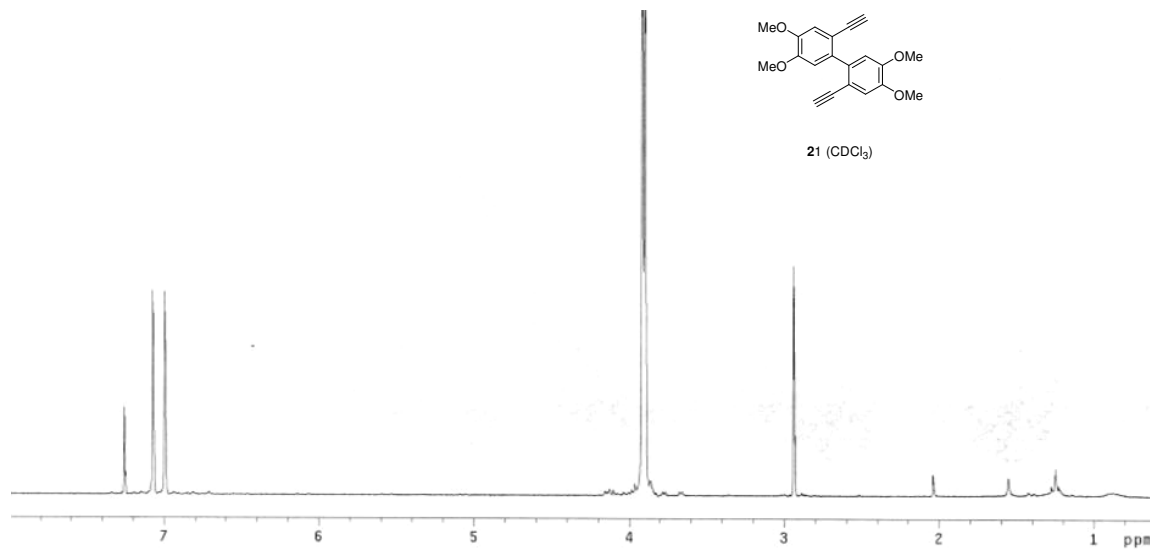

Supplement: b811068a.pdf [file b811068a.pdf]
